# Supplementary material for: Structural and functional studies on Pseudomonas aeruginosa DspI: implications for its role in DSF biosynthesis
Source: PubMed Central journal article supplement (PMC5834635; doi:10.1038/s41598-018-22300-1), 2018-03-02
Supplement: 41598_2018_22300_MOESM1_ESM.pdf [file 41598_2018_22300_MOESM1_ESM.pdf]

**Title: Structural and functional studies on *Pseudomonas aeruginosa* DspI:**

**implications for its role in DSF biosynthesis**

Li Liu<sup>1,2</sup>, Tao Li<sup>1</sup>, Xing-Jun Cheng<sup>1</sup>, Cui-Ting Peng<sup>1</sup>, Chang-Cheng Li<sup>1</sup>, Li-Hui He<sup>1</sup>, Si-Min Ju<sup>1</sup>, Ning-Yu Wang<sup>3</sup>, Ting-Hong Ye<sup>1</sup>, Mao Lian<sup>1</sup>, Qing-Jie Xiao<sup>1</sup>, Ying-Jie Song<sup>1</sup>, Yi-Bo Zhu<sup>1</sup>, Luo-Ting Yu<sup>1\*</sup>, Zhen-Ling Wang<sup>1\*</sup>, Rui Bao<sup>1\*</sup>.

## Supplementary Figure Legends

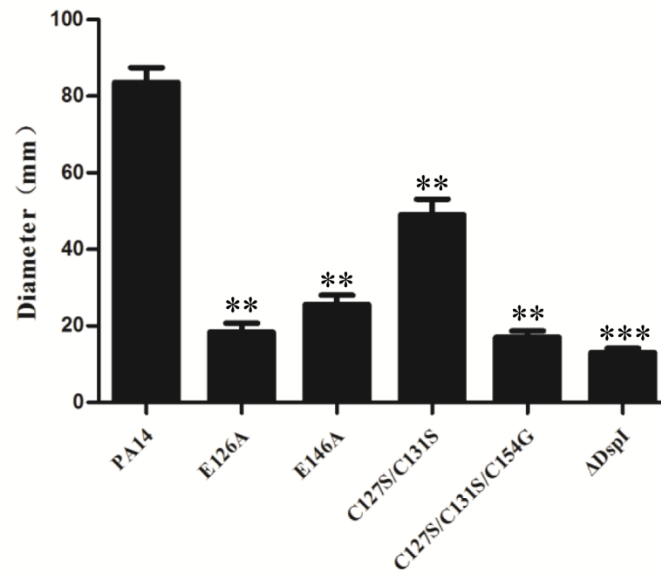

**Fig. S1:** Statistical results of swarming motility assays presented as the length of the colony tendrils growth. Data shown are represent of three independent experiments. *P* values for comparison of two groups were determined by 2-tailed Student's *t* test (\* $P < 0.05$ , \*\* $P < 0.01$  vs wild-type PA14).

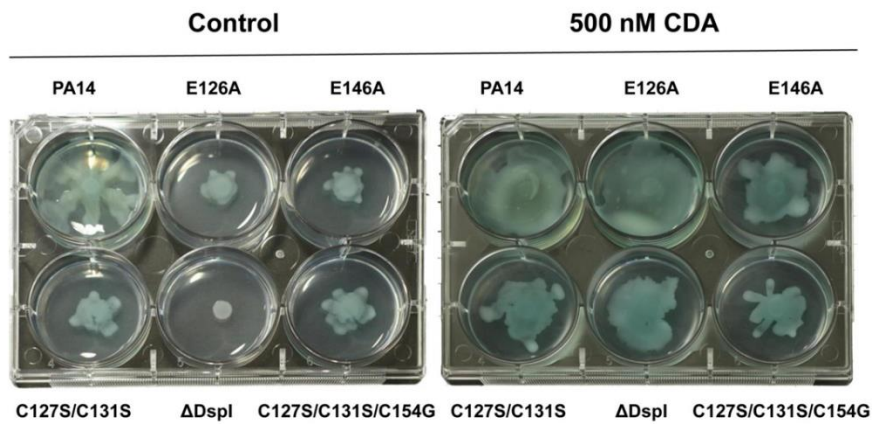

**Fig. S2:** The swarming-defective phenotype of PA14 mutations could be recovered after the exogenous CDA supplied. PA14 as well as strains carrying mutations in genes were incubated at 37 °C for 16 h in modified M8 plates supplemented with CDA at 500 nM.

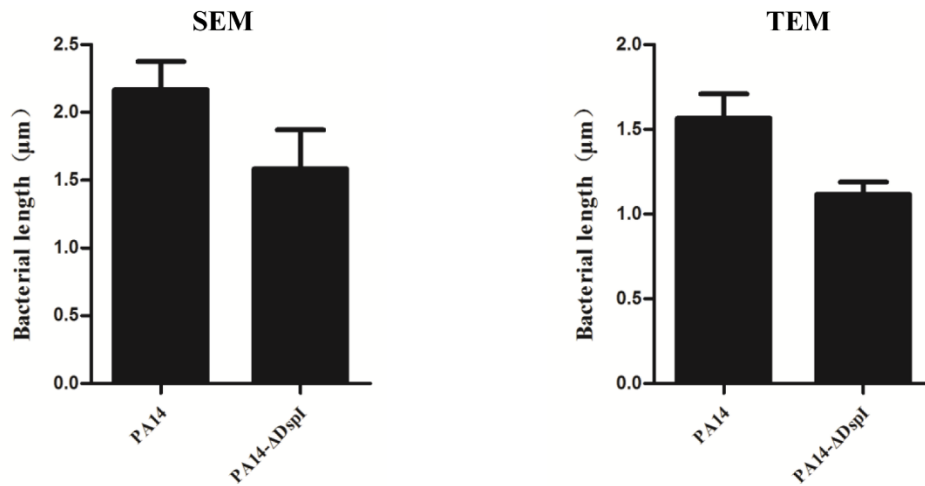

**Fig. S3:** Statistical results of SEM and TEM assays presented as the size of the bacteria

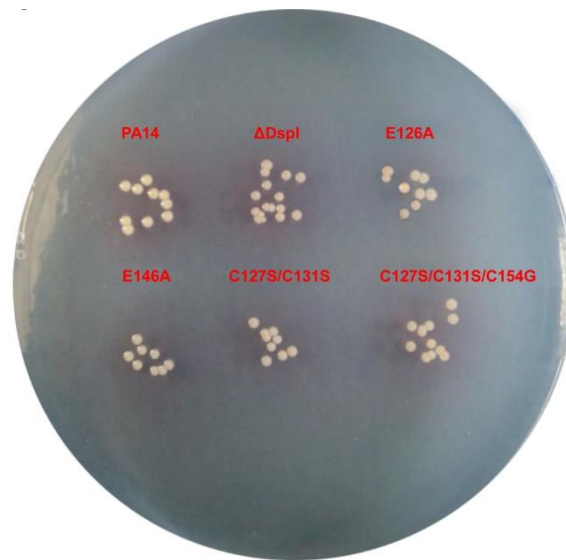

**Fig. S4:** The PA14 mutation strains exhibited no growth difference relative to wild-type PA14. Wild-type PA14 as well as mutation strains were serially ten-fold dilution to  $10^{-6}$ . Dispense 10 microliters of the last dilution onto the PIA solid medium plates and then take it picture.

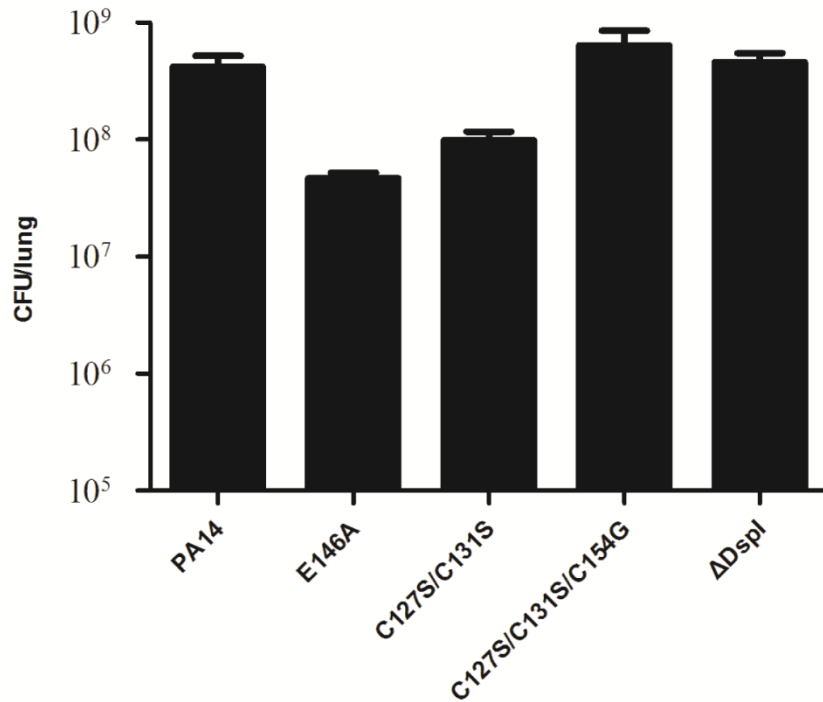

**Fig. S5:** Mice were infected with mutation strains in lung exhibited almost no difference relative to wild-type PA14. Mice were infected with  $5\sim 10 \times 10^6$  CFU/lung of PA14 or mutation strains embedded in agar beads, three days later, the lung was harvested, homogenized, and counted respectively.

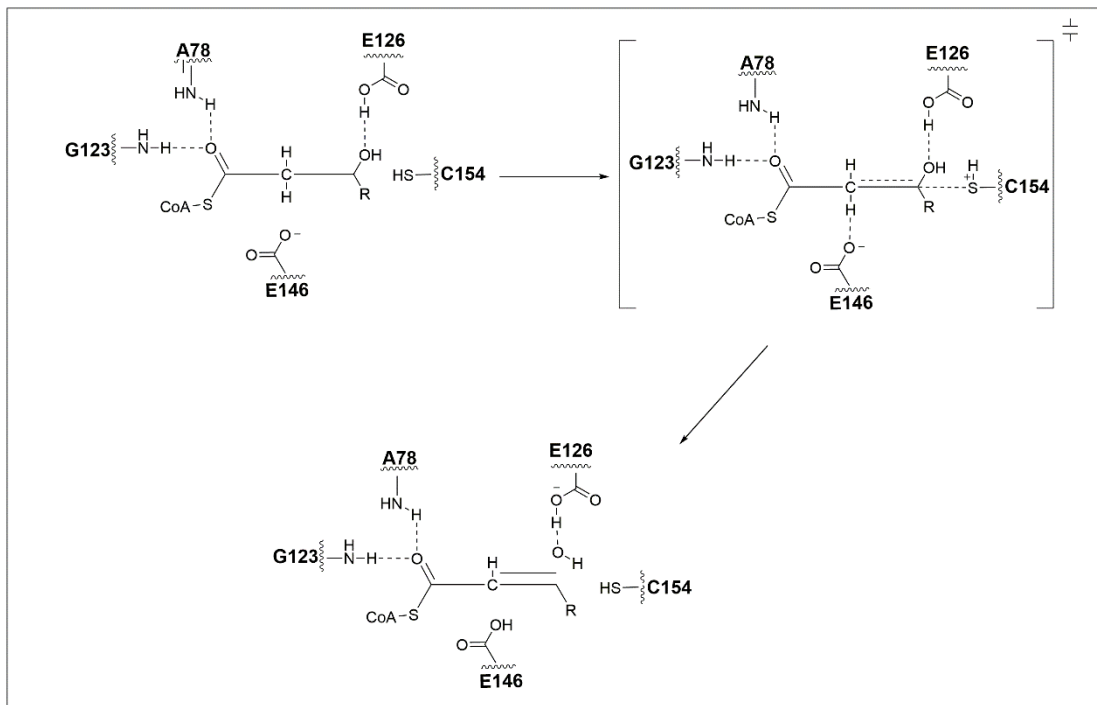

**Fig. S6:** Possible reaction mechanism for DspI based on its three-dimensional X-ray structure and AutoDock suite.
